# Supplementary material for: Impact of Adenovirus E4-ORF3 Oligomerization and Protein Localization on Cellular Gene Expression
Source: MDPI journal article supplement (doi:10.3390/v7052428), 2015-05-13
Supplement: s1 [file s1]

# Supplementary Materials

## 1. Supplementary Figures

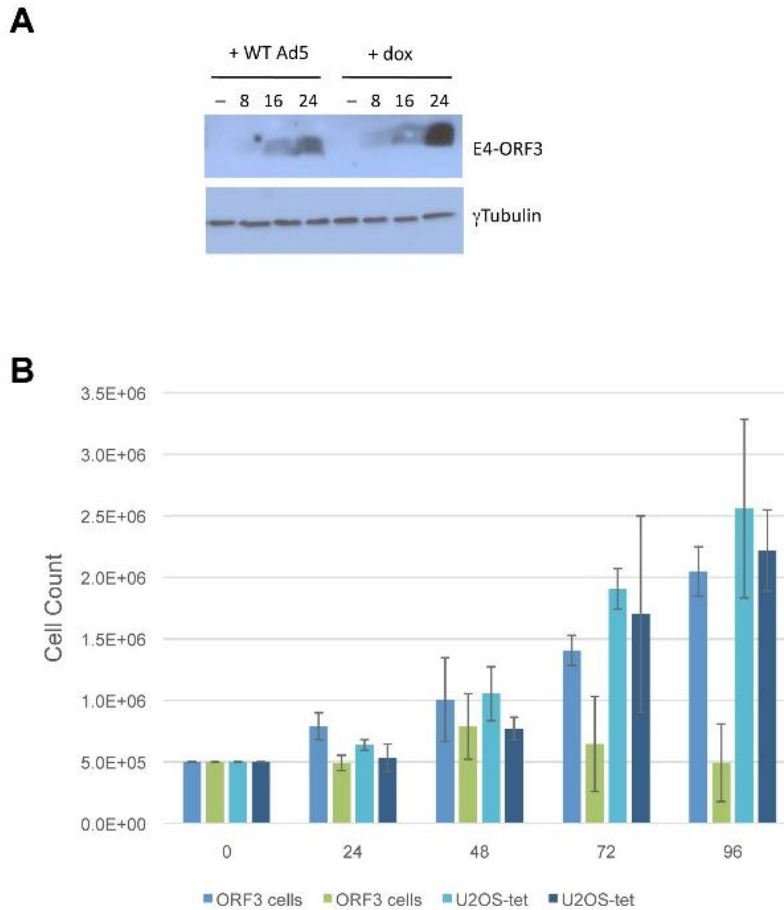

**Figure S1.** E4-ORF3 expression in Tet-E4-ORF3 cells. **(A)** HeLa cells were uninfected or infected with WT Ad5 and harvested at 8, 16 and 24 hpi (lanes 1-4); Tet-E4-ORF3 cells were uninduced or induced with dox and harvested at 8, 16 or 24 h (lanes 5-8). E4-ORF3 protein levels were analyzed by Western blot. **(B)** Growth kinetics of U2OSTtet and Tet-E4-ORF3 cells in the presence or absence of dox treatment.  $5 \times 10^5$  cells per dish were plated in the presence or absence of 1  $\mu\text{g/ml}$  dox. Cells were counted at 24h intervals.  $N = 3$ , error bars = S.D.

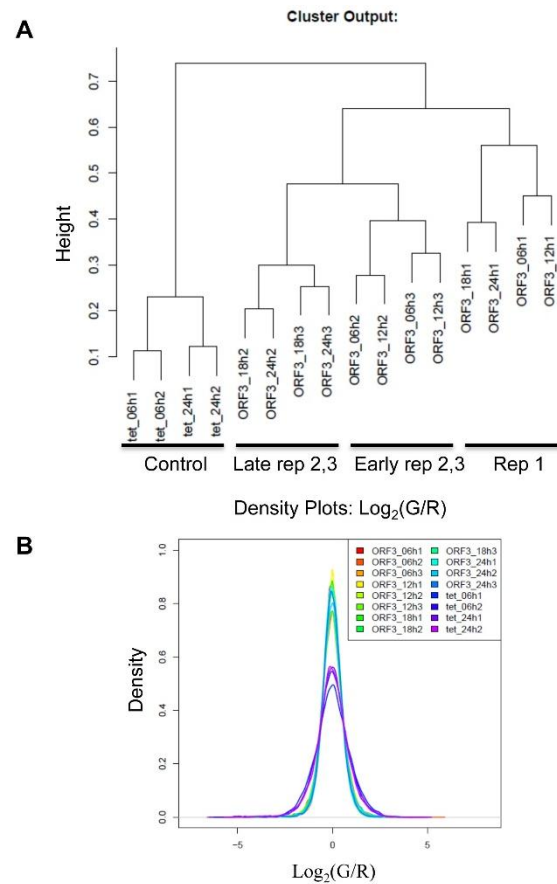

**Figure S2.** Quality control analysis of microarray data. **(A)** Dendrogram of hierarchical cluster analysis of microarray replicates. **(B)** Density plot of  $\text{Log}_2$  ratio of green:red fluorescence (X axis) plotted against percentage of genes possessing that fluorescence ratio (Y axis).

## 2. Supplementary Tables

**Table S1.** Genes that display a twofold or greater E4-ORF3-dependent change in expression at 24h post-induction relative to 6h post-induction,  $P < 0.01$ .

**Table S2.** Gene expression information corresponding to cluster 1.

**Table S3.** Gene expression information corresponding to cluster 2.

**Table S4.** qPCR primer sequences and associated efficiencies. Primer efficiencies were calculated by the equation  $E = 10^{(-1/\text{slope of standard curve})}$
